# Supplementary material
Source: publisher figshare collection journal article supplement (https://f1000.figshare.com/articles/dataset/_/722928)
Supplement: Supplementary file 1 [file 1]

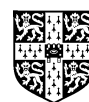

All answers given are confidential and will only be seen by the research team.

1. Date of birth:

2. How long have you had the pain discussed in the questionnaires?

3. Are you currently taking any prescribed or unprescribed medications? If so what are these?

4. Approximately how much alcohol, if any, have you consumed in the last 24 hours?

5. Are you currently using any recreational drugs - if so which and how much?

6. How long have you been homeless/when did you first use homeless shelters?

7. What do you feel was the main contributing factor for becoming homeless?

- Relationship breakdown [ ]
- Family problems [ ]
- Drug and alcohol problems [ ]
- Health problems [ ]
- Financial [ ]
- Leaving prison [ ]
- Other [ ]

8. Where would you say you spend the majority of nights over the last weeks/months?

- Shelter [ ]
- Rough sleeping/streets [ ]
- Friend/relative's accommodation [ ]
- Other [ ]
